# Supplementary material
Source: PubMed Central journal article supplement (PMC4790649)
Supplement: luga004920.wt2_default.pdf [file luga004920.wt2_default.pdf]

**Table A.2** Proportion of infection in risk groups and probability of complications (hospitalizations and deaths) given infection.

|                                |           | Age groups            |                       |                       |                       |                       |                       |
|--------------------------------|-----------|-----------------------|-----------------------|-----------------------|-----------------------|-----------------------|-----------------------|
|                                |           | 0-4                   | 5-12                  | 13-19                 | 20-39                 | 40-64                 | 65+                   |
| Proportion of total population | high risk | 0.0014                | 0.0023                | 0.0020                | 0.0162                | 0.0215                | 0.0506                |
|                                | low risk  | 0.0577                | 0.0951                | 0.0835                | 0.2478                | 0.3278                | 0.0942                |
| Probability of hospitalization | high risk | $8.70 \times 10^{-3}$ | $8.70 \times 10^{-3}$ | $8.70 \times 10^{-3}$ | $1.29 \times 10^{-2}$ | $1.29 \times 10^{-2}$ | $3.36 \times 10^{-2}$ |
|                                | low risk  | $3.45 \times 10^{-5}$ | $3.45 \times 10^{-5}$ | $3.45 \times 10^{-5}$ | $4.31 \times 10^{-5}$ | $4.31 \times 10^{-5}$ | $5.85 \times 10^{-3}$ |
| Probability of death           | high risk | $3.44 \times 10^{-4}$ | $3.44 \times 10^{-4}$ | $3.44 \times 10^{-4}$ | $5.11 \times 10^{-4}$ | $5.11 \times 10^{-4}$ | $1.69 \times 10^{-2}$ |
|                                | low risk  | $1.47 \times 10^{-5}$ | $1.47 \times 10^{-5}$ | $1.47 \times 10^{-5}$ | $1.83 \times 10^{-5}$ | $1.83 \times 10^{-5}$ | $3.21 \times 10^{-3}$ |

Source: (13) Confidence intervals were not available.
